# Supplementary material
Source: publisher figshare collection journal article supplement (https://acs.figshare.com/ndownloader/files/24184983)
Supplement: Supplementary file 1 [file 24184983]

## Supporting Information for:

### Layered Perovskite (CH<sub>3</sub>NH<sub>3</sub>)<sub>2</sub>Pb(SCN)<sub>2</sub>I<sub>2</sub> Single Crystals: Phase Transition and Moisture Stability

Yangyang Dang \*†‡ Guokui Liu,§ Jiewu Song, † Lingqiang Meng, ¶ Yajing Sun, ‡ Wenping Hu ‡ and Xutang Tao\*†

†State Key Laboratory of Crystal Materials & Institute of Crystal Materials, Shandong University, No. 27 Shanda South Road, Jinan, 250100, P. R. China.

‡Tianjin Key Laboratory of Molecular Optoelectronic Sciences & Department of Chemistry, School of Sciences, & Collaborative Innovation Center of Chemical Science and Engineering, Tianjin University, Tianjin, 300072, P. R. China.

§School of Chemistry and Chemical Engineering, Linyi University, Linyi, 276000, P. R. China.

¶ Materials Interfaces Center, Shenzhen Institutes of Advanced Technology, Chinese Academy of Sciences, Shenzhen 518055, P.R. China.

#### Corresponding Author

\*(Y. D.) Email: yeung\_dang@tju.edu.cn

\*(X. T.) Email: txt@sdu.edu.cn

## EXPERIMENTAL METHODS

**Figure S1.** Photo and powder XRD diffractions of  $\text{Pb}(\text{SCN})_2$  powders obtained from the synthesis of  $\text{Pb}(\text{CH}_3\text{COO})_2 \cdot 3\text{H}_2\text{O}$  and  $\text{NaSCN}$ , indicating the impurities of  $\text{NaSCN}$ .

**Figure S2. (a-b)** Photo and powder XRD diffractions of pure  $\text{Pb}(\text{SCN})_2$  powders obtained from the synthesis of  $\text{Pb}(\text{BF}_4)_2$  and  $\text{NaSCN}$ , indicating the pure phase  $\text{Pb}(\text{SCN})_2$ ; **(c-d)** Photo and powder XRD diffractions of  $\text{MA}_2\text{Pb}(\text{SCN})_2\text{I}_2$  single crystal obtained by slow evaporation method using THF solvent.

**Figure S3.** The crystal structure of  $\text{Pb}(\text{SCN})_2$  along the  $[001]$  direction obtained by THF or DMF solvent.

**Figure S4.** (a) The yellow transparent solution obtained by as-synthesized MAI and  $\text{Pb}(\text{SCN})_2$ ; (b) The turbid solution using the commercialized counterparts of MAI and  $\text{Pb}(\text{SCN})_2$

**Figure S5 (a)** UV-vis absorption spectra of  $\text{MA}_2\text{Pb}(\text{SCN})_2\text{I}_2$  single-crystalline powder samples obtained by different crystal growth methods; **(b)** Band gap of  $\text{MA}_2\text{Pb}(\text{SCN})_2\text{I}_2$  single-crystalline powder samples obtained by different crystal growth methods, inset: direct band gap of 2.1 eV and indirect band gap of 1.97~1.99 eV; **(c)** PL spectra of  $\text{MA}_2\text{Pb}(\text{SCN})_2\text{I}_2$  single-crystalline powder samples obtained by different crystal growth methods under 420 nm irradiation condition.

**Figure S6.** Crystal structural units of  $(\text{CH}_3\text{NH}_3)_2\text{Pb}(\text{SCN})_2\text{I}_2$  at 190 K and 293 K

**Figure S7. (a)**  $\text{Pb}(\text{SCN})_2\text{I}_4$  unit of  $\text{MA}_2\text{Pb}(\text{SCN})_2\text{I}_2$  at 293 K; **(b)**  $\text{Pb}(\text{SCN})_2\text{I}_4$  unit of  $\text{MA}_2\text{Pb}(\text{SCN})_2\text{I}_2$  at 363 K

**Figure S8.** High temperature phase transition processes of  $\text{MA}_2\text{Pb}(\text{SCN})_2\text{I}_2$  powders by mechanical mixing method, corresponding to the powder XRD patterns

**Figure S9.** PXRD patterns of  $\text{MA}_2\text{Pb}(\text{SCN})_2\text{I}_2$  single-crystalline samples during melting and solidification processes in inert and air atmosphere.

**Figure S10.** The phase transition processes of  $\text{MA}_2\text{Pb}(\text{SCN})_2\text{I}_2$  thin film at high temperature

**Figure S11.** The detailed phase transition processes of  $\text{MA}_2\text{Pb}(\text{SCN})_2\text{I}_2$  thin film at high temperature

**Figure S12.** Stability and powder XRD patterns of  $\text{MA}_2\text{Pb}(\text{SCN})_2\text{I}_2$  single-crystalline samples at different conditions (air, light illumination, vacuum and moisture)

**Figure S13.** Core level XPS spectra for  $\text{MA}_2\text{Pb}(\text{SCN})_2\text{I}_2$  single crystal obtained by fresh synthesized and place in air for a long time. **(a)** XPS survey; **(b)** S 2p, **(c)** I 3d, **(d)** Pb 4f, **(e)** C 1s and **(f)** N 1s

**Figure S14.** Transformation processes of  $\text{MAPbI}_3$  single-crystalline grinding powder samples immersing in  $\text{H}_2\text{O}$  and then heating to 90 °C and cooling down to room temperature in air, which was verified to be  $\text{MAPbI}_3$  and  $\text{PbI}_2$  mixtures

**Table S1.** Crystal data and structure refinements for  $\text{Pb}(\text{SCN})_2$  and  $\text{MA}_2\text{Pb}(\text{SCN})_2\text{I}_2$  at 293(2)K

**Table S2.** Crystal data and structure refinements for  $\text{MA}_2\text{Pb}(\text{SCN})_2\text{I}_2$  at 293(2)K.

**Table S3.** Crystal data and structure refinements for  $\text{MA}_2\text{Pb}(\text{SCN})_2\text{I}_2$  at 190 K and 363 K

**Table S4.** Crystal data and structure refinements for  $\text{MAPbI}_3$  and  $\text{MA}_2\text{Pb}(\text{SCN})_2\text{I}_2$  obtained when exposed to  $\text{H}_2\text{O}$  and then heating to 90 °C and cooling down to room temperature in air.

**Movie S1.** The phase transition processes of  $\text{MA}_2\text{Pb}(\text{SCN})_2\text{I}_2$  powders in ambient atmosphere.

**Movie S2.** The phase transition processes of  $\text{MA}_2\text{Pb}(\text{SCN})_2\text{I}_2$  thin films in ambient atmosphere.

## EXPERIMENTAL METHODS

**Single-crystal and Powder X-ray Diffraction Studies.**  $\text{MA}_2\text{Pb}(\text{SCN})_2\text{I}_2$  single-crystalline powders were measured using a *Bruker-AXS D8 ADVANCE X-Ray* diffractometer with  $\text{Cu-K}\alpha_1$  radiation ( $\lambda = 1.54186$  Å) in the range of  $10^\circ$ - $80^\circ$  ( $2\theta$ ), which was also depicted elsewhere.<sup>1-5</sup> The suitable crystals of  $\text{MA}_2\text{Pb}(\text{SCN})_2\text{I}_2$  were selected and fixed on a *SuperNova*, Dual, Cu at zero, *AtlasS2* diffractometer. The crystal was kept at 190 K, 293(2) K and 363 K during data collection. Using *Olex2*,<sup>6</sup> the structure was solved with the *ShelXS*<sup>7</sup> structure solution program using direct methods and refined with the *ShelXL*<sup>8</sup> refinement package using Least Squares minimization.

**Thermogravimetric Analysis (TGA) and Differential Scan Calorimetry (DSC) Measurements.** Differential scanning calorimetry (DSC) and thermogravimetric analysis (TGA) were carried out using a TGA/DSC1/1600HT analyzer (*METTLER TOLEDO* Instruments).  $\text{MA}_2\text{Pb}(\text{SCN})_2\text{I}_2$  samples were placed in a platinum crucible, and heated at a rate of  $10^\circ\text{C min}^{-1}$  from room temperature to  $800^\circ\text{C}$  under flowing nitrogen gas. Differential Scan calorimetry (DSC) measurements were performed on Polyma Instruments (DSC-200-F3 Maia).  $\text{MA}_2\text{Pb}(\text{SCN})_2\text{I}_2$  powder samples were placed in a platinum crucible, and heated at a rate of  $10^\circ\text{C min}^{-1}$  from room temperature to  $127^\circ\text{C}$ , and then cooled to  $-93^\circ\text{C}$  in liquid  $\text{N}_2$  atmosphere and shifted back to room temperature under flowing  $\text{N}_2$  gas.

**UV-vis-NIR diffuse reflectance spectra measurements.** UV-vis-NIR diffuse reflectance spectroscopy was carried out using a Varian Cary 5000 spectrophotometer equipped with an integrating sphere over the spectral range 300-800 nm.  $\text{MA}_2\text{Pb}(\text{SCN})_2\text{I}_2$  single crystals were grinded into single-crystalline powders. A  $\text{BaSO}_4$  plate was used as the standard (100% reflectance). The absorption spectrum was calculated from the reflectance spectrum using the Kubelka-Munk function:  $\alpha/S = (1-R)/(2R)$ ,<sup>9</sup> where  $\alpha$  is the absorption coefficient,  $S$  is the scattering coefficient, and  $R$  is the reflectance.

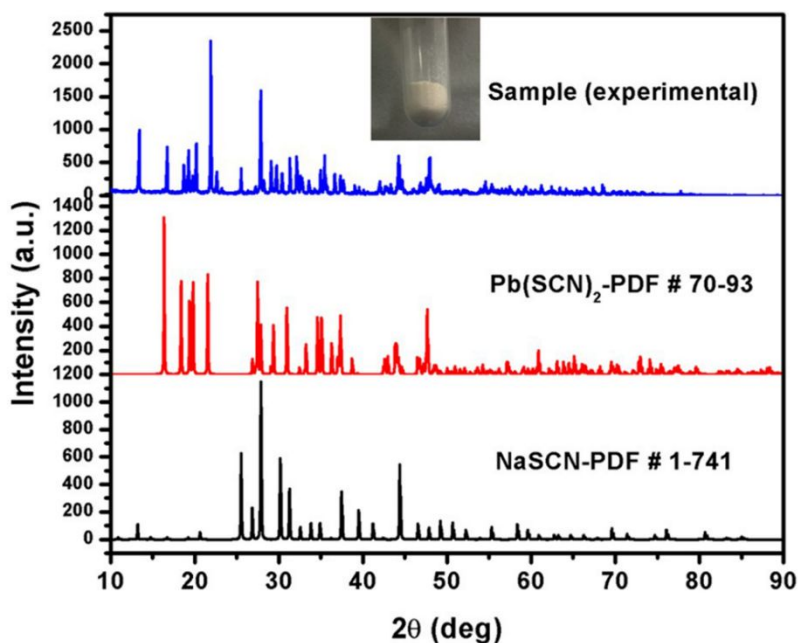

**Figure S1.** Photo and powder XRD diffractions of  $\text{Pb}(\text{SCN})_2$  powders obtained from the synthesis of  $\text{Pb}(\text{CH}_3\text{COO})_2 \cdot 3\text{H}_2\text{O}$  and  $\text{NaSCN}$ , indicating the impurities of  $\text{NaSCN}$ .

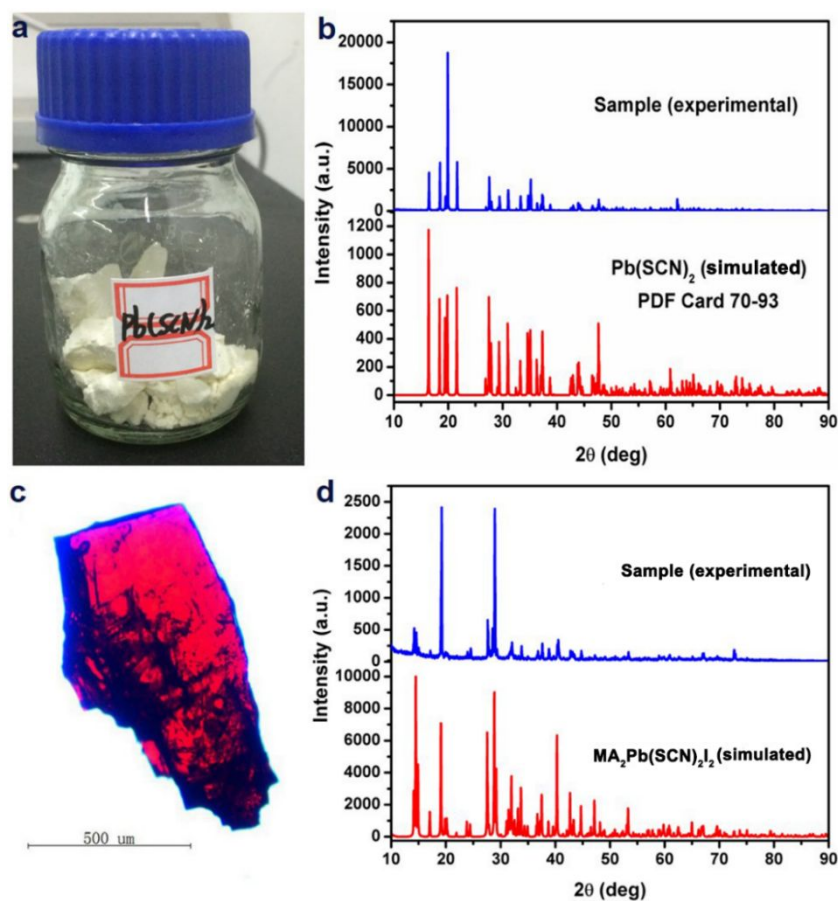

**Figure S2.** (a-b) The photo and powder XRD diffractions of pure  $\text{Pb}(\text{SCN})_2$  powders obtained from the synthesis of  $\text{Pb}(\text{BF}_4)_2$  and  $\text{NaSCN}$ , indicating the pure phase  $\text{Pb}(\text{SCN})_2$ ; (c-d) The photo and powder XRD diffractions of  $\text{MA}_2\text{Pb}(\text{SCN})_2\text{I}_2$  single crystal obtained by slow evaporation method using THF solvent.

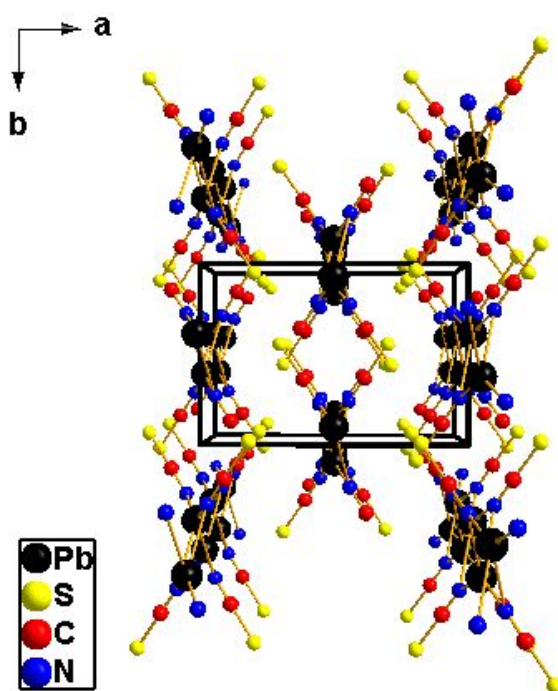

**Figure S3.** The crystal structure of  $\text{Pb}(\text{SCN})_2$  along the  $[001]$  direction obtained by THF or DMF solvent.

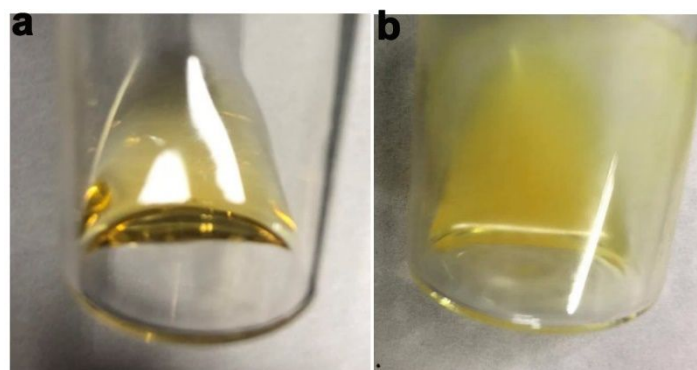

**Figure S4.** (a) The yellow transparent solution obtained by as-synthesized MAI and  $\text{Pb}(\text{SCN})_2$ ; (b) The turbid solution using the commercialized counterparts of MAI and  $\text{Pb}(\text{SCN})_2$

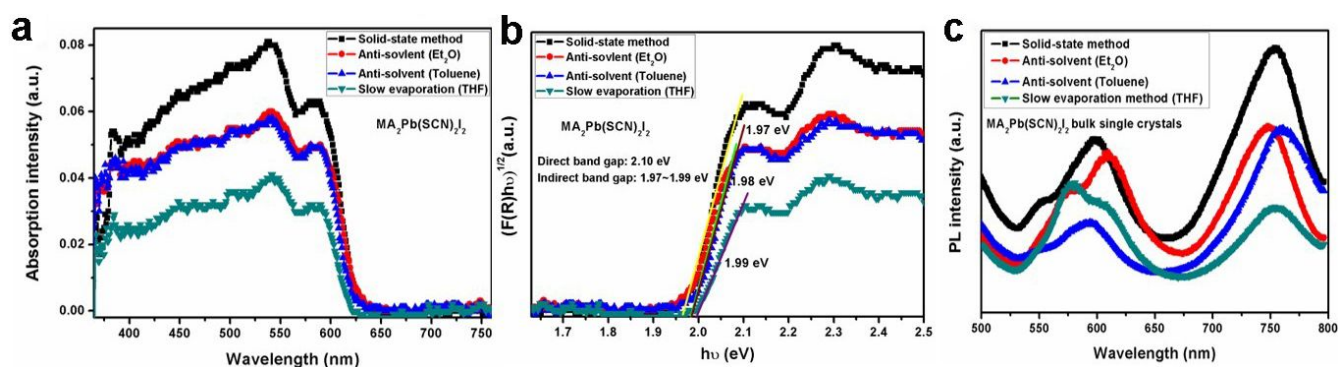

**Figure S5** (a) UV-vis absorption spectra of  $\text{MA}_2\text{Pb}(\text{SCN})_2\text{I}_2$  grinding powder samples obtained by different crystal growth methods; (b) Band gap of  $\text{MA}_2\text{Pb}(\text{SCN})_2\text{I}_2$  grinding powder samples obtained by different crystal growth methods, inset: direct band gap of 2.1 eV and indirect band gap of 1.97~1.99 eV;

(c) PL spectra of  $\text{MA}_2\text{Pb}(\text{SCN})_2\text{I}_2$  grinding powder samples obtained by different crystal growth methods under 420 nm irradiation condition.

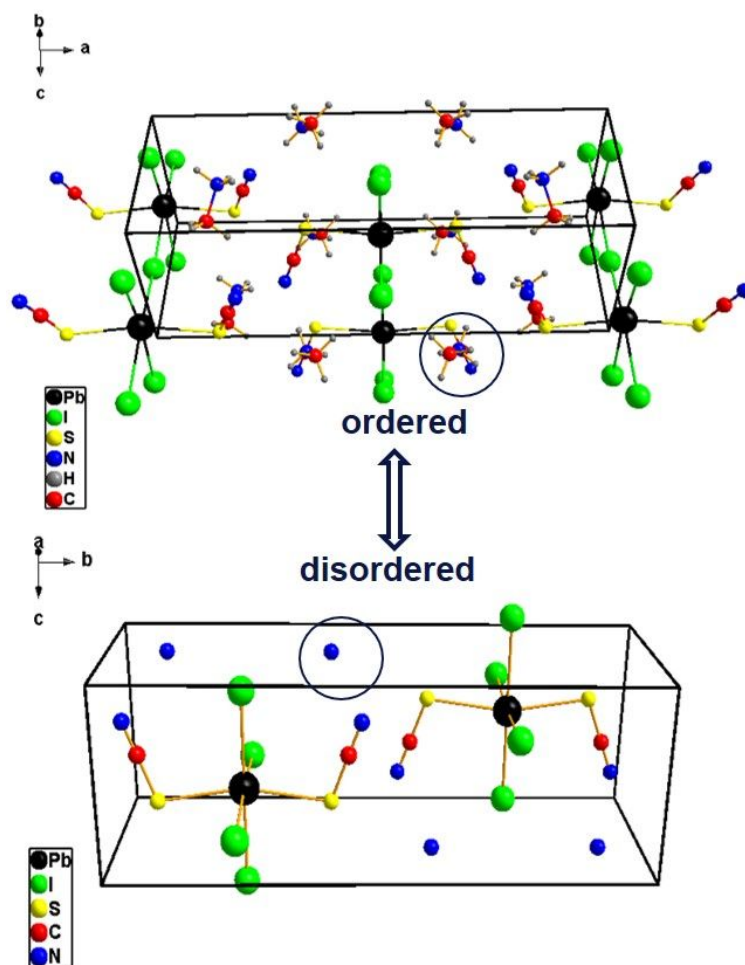

**Figure S6.** The crystal structural units of  $(\text{CH}_3\text{NH}_3)_2\text{Pb}(\text{SCN})_2\text{I}_2$  at 190 K and 293 K

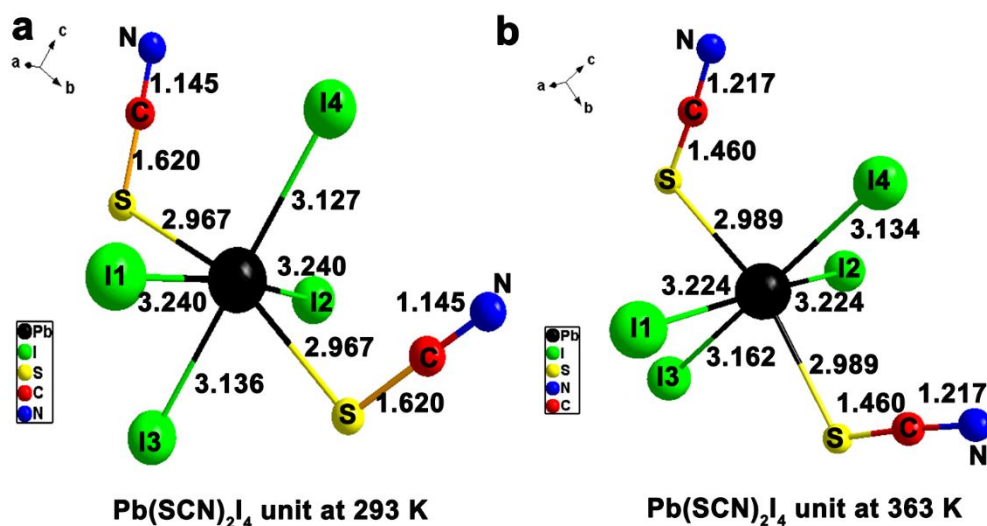

**Figure S7.** (a)  $\text{Pb}(\text{SCN})_2\text{I}_4$  unit of  $\text{MA}_2\text{Pb}(\text{SCN})_2\text{I}_2$  at 293 K; (b)  $\text{Pb}(\text{SCN})_2\text{I}_4$  unit of  $\text{MA}_2\text{Pb}(\text{SCN})_2\text{I}_2$  at 363 K



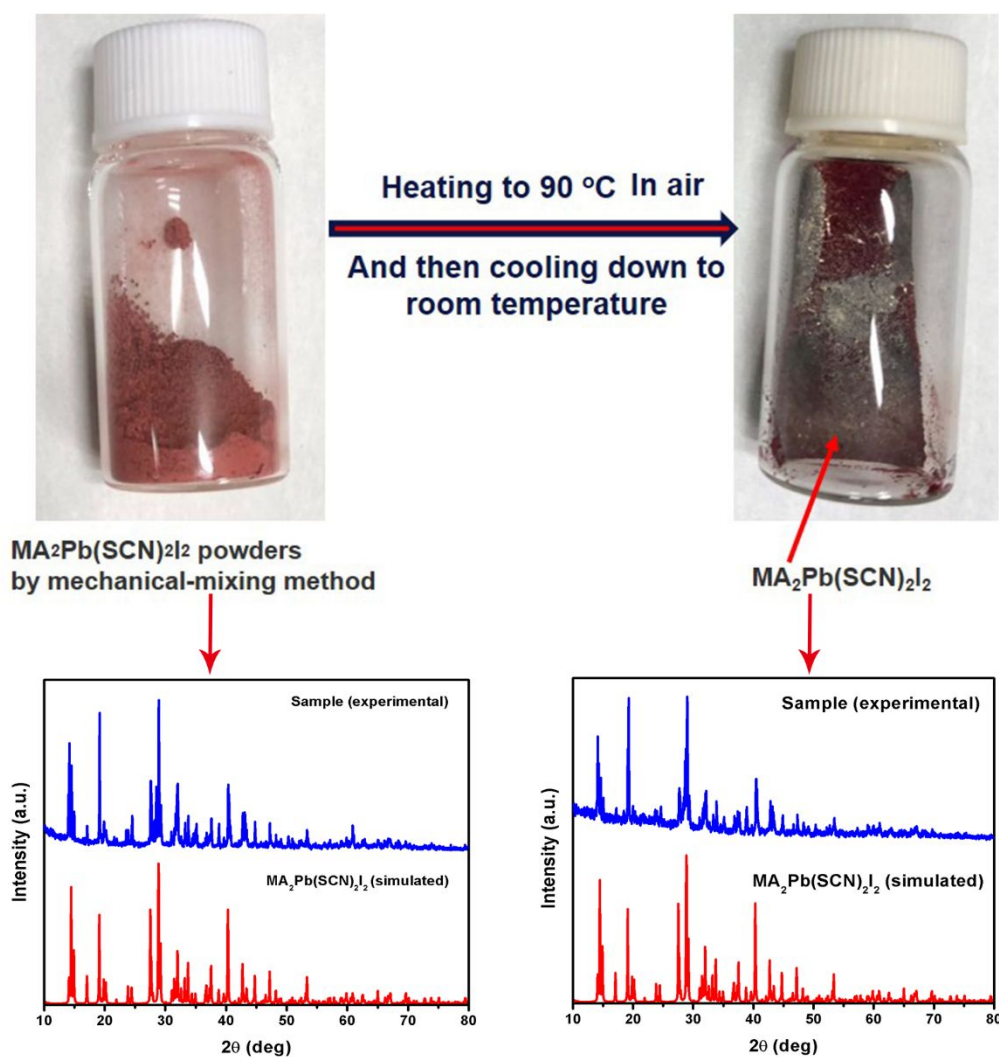

**Figure S8.** The high temperature phase transition processes of  $\text{MA}_2\text{Pb}(\text{SCN})_2\text{I}_2$  powders by mechanical mixing method, corresponding to the powder XRD patterns

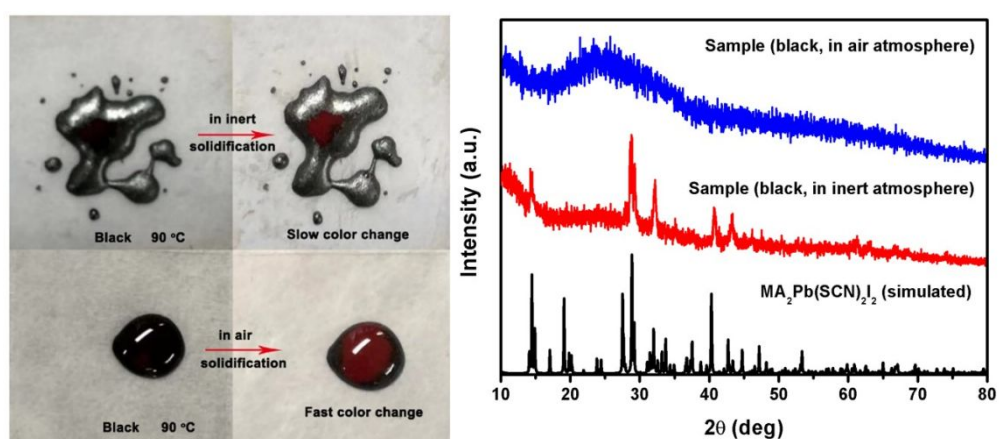

**Figure S9.** PXRD patterns of  $\text{MA}_2\text{Pb}(\text{SCN})_2\text{I}_2$  single-crystalline samples during melting and solidification processes in inert and air atmosphere.



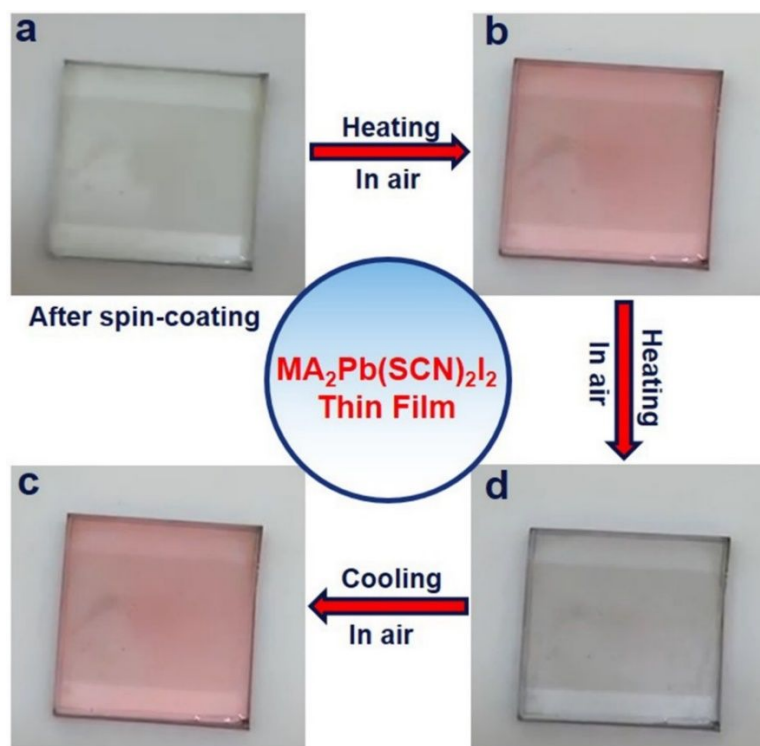

**Figure S10.** The phase transition processes of  $\text{MA}_2\text{Pb}(\text{SCN})_2\text{I}_2$  thin film at higher temperature (90 °C).

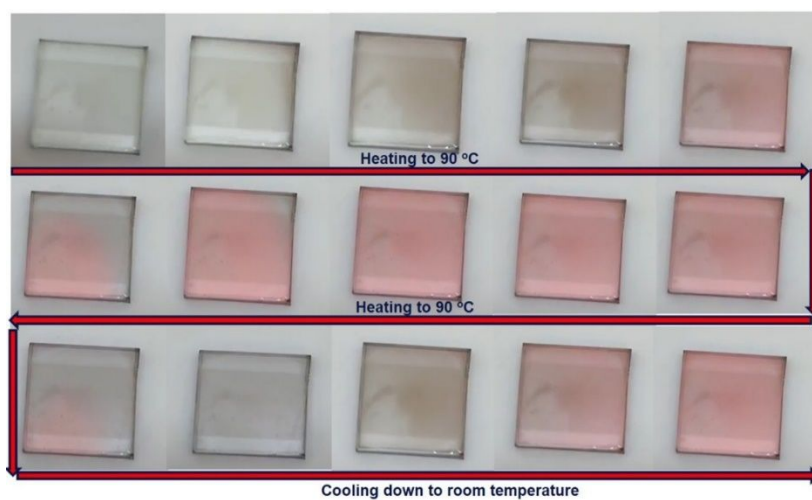

**Figure S11.** The detailed phase transition processes of  $\text{MA}_2\text{Pb}(\text{SCN})_2\text{I}_2$  thin film at high temperature

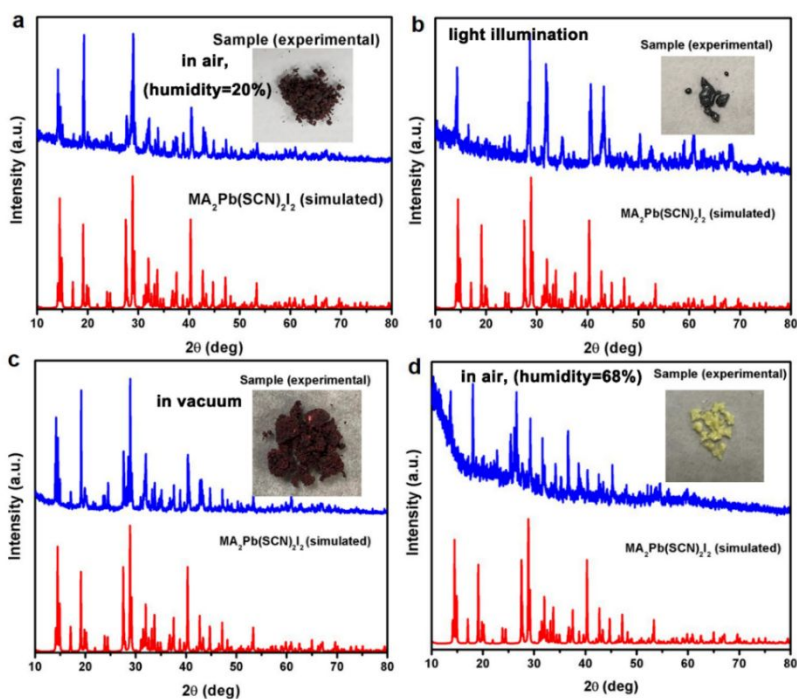

**Figure S12.** Stability and powder XRD patterns of  $\text{MA}_2\text{Pb}(\text{SCN})_2\text{I}_2$  single-crystalline samples at different conditions (air, light illumination, vacuum and moisture)

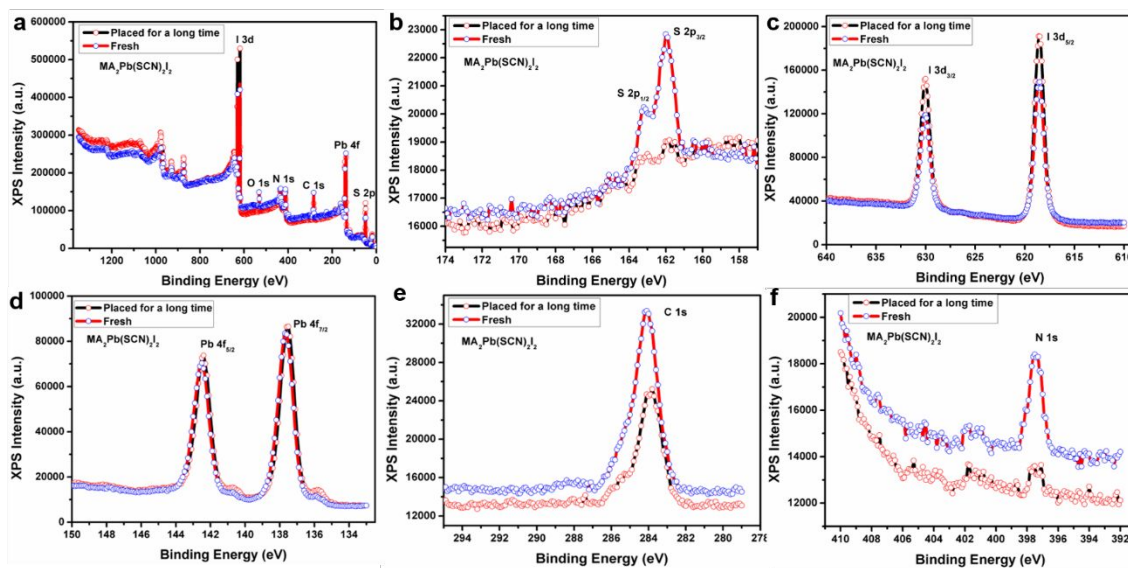

**Figure S13.** Core level XPS spectra for  $\text{MA}_2\text{Pb}(\text{SCN})_2\text{I}_2$  single crystal obtained by fresh synthesized and place in air for a long time, (a) XPS survey; (b) S 2p, (c) I 3d, (d) Pb 4f, (e) C 1s and (f) N 1s.

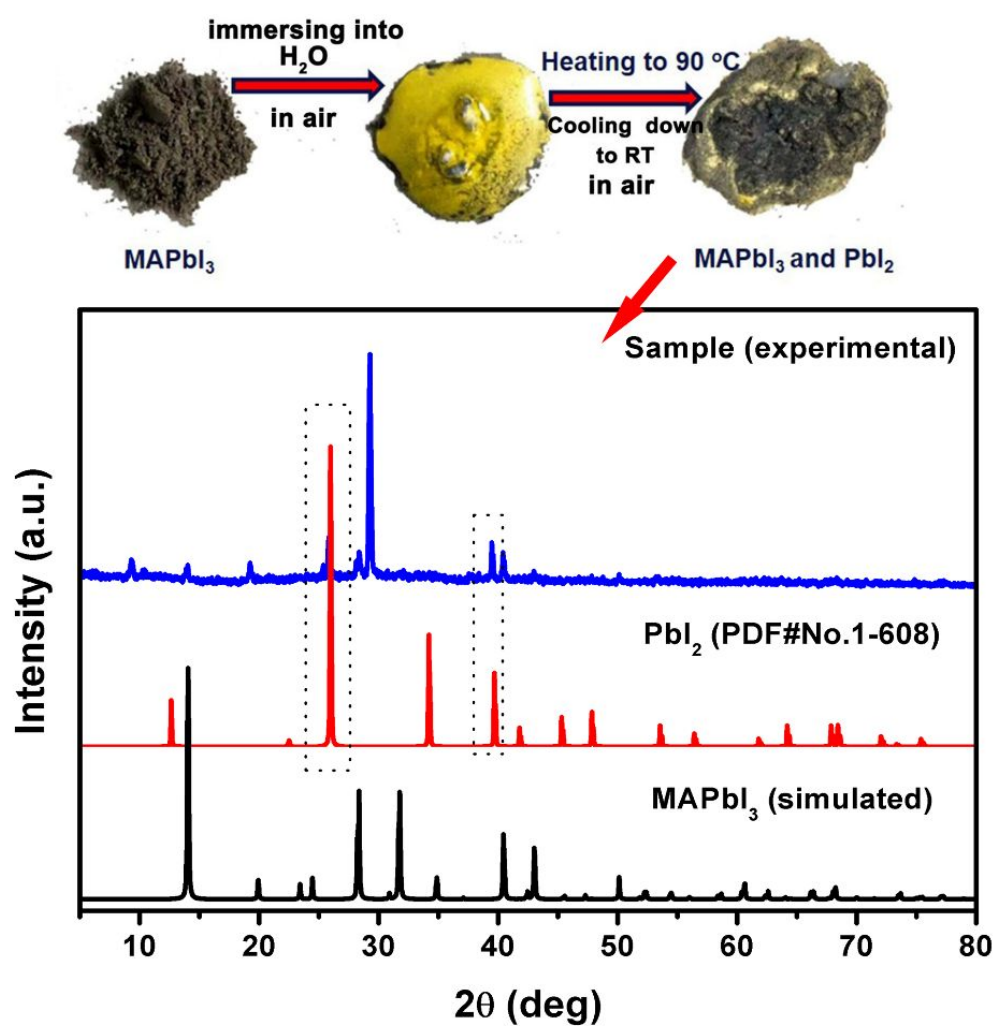

**Figure S14.** Transformation processes of MAPbI<sub>3</sub> single-crystalline grinding powder samples immersing in H<sub>2</sub>O and then heating to 90 °C and cooling down to room temperature in air, which was verified to be MAPbI<sub>3</sub> and PbI<sub>2</sub> mixtures.

**Table S1.** Crystal data and structure refinements for Pb(SCN)<sub>2</sub> and MA<sub>2</sub>Pb(SCN)<sub>2</sub>I<sub>2</sub> at 293(2) K

| Empirical formula                                                            | Pb(SCN) <sub>2</sub> <sup>a</sup>                                                                                                                                                                                                           | (CH <sub>3</sub> NH <sub>3</sub> ) <sub>2</sub> Pb(SCN) <sub>2</sub> I <sub>2</sub> <sup>b</sup> |
|------------------------------------------------------------------------------|---------------------------------------------------------------------------------------------------------------------------------------------------------------------------------------------------------------------------------------------|--------------------------------------------------------------------------------------------------|
| Actual formula                                                               | Pb(SCN) <sub>2</sub>                                                                                                                                                                                                                        | (CN) <sub>2</sub> Pb(SCN) <sub>2</sub> I <sub>2</sub>                                            |
| Formula weight/ g·mol <sup>-1</sup>                                          | 323.35                                                                                                                                                                                                                                      | 629.19                                                                                           |
| Temperature/K                                                                | 293(2) K                                                                                                                                                                                                                                    |                                                                                                  |
| Wavelength/Å                                                                 | 0.71073                                                                                                                                                                                                                                     |                                                                                                  |
| Crystal color                                                                | Colorless                                                                                                                                                                                                                                   | Dark red                                                                                         |
| Crystal system                                                               | Monoclinic                                                                                                                                                                                                                                  | Orthorhombic                                                                                     |
| Space group                                                                  | <i>C2/c</i> (no. 15)                                                                                                                                                                                                                        | <i>Pmn2<sub>1</sub></i> (no. 31)                                                                 |
| <i>a</i> /Å                                                                  | 9.6575(4)                                                                                                                                                                                                                                   | 18.5640(15)                                                                                      |
| <i>b</i> /Å                                                                  | 6.5439(3)                                                                                                                                                                                                                                   | 6.2639(4)                                                                                        |
| <i>c</i> /Å                                                                  | 8.2514(4)                                                                                                                                                                                                                                   | 6.4739(4)                                                                                        |
| $\alpha$ /°                                                                  | 90.00                                                                                                                                                                                                                                       | 90.00                                                                                            |
| $\beta$ /°                                                                   | 92.266(2)                                                                                                                                                                                                                                   | 90.00                                                                                            |
| $\gamma$ /°                                                                  | 90.00                                                                                                                                                                                                                                       | 90.00                                                                                            |
| Volume/Å <sup>-3</sup>                                                       | 521.06(4)                                                                                                                                                                                                                                   | 752.80(9)                                                                                        |
| Crystal size (mm <sup>3</sup> )                                              | 0.2×0.15×0.1                                                                                                                                                                                                                                | 0.12×0.1×0.05                                                                                    |
| <i>Z</i>                                                                     | 4                                                                                                                                                                                                                                           | 2                                                                                                |
| Density/g·cm <sup>-3</sup>                                                   | 4.122                                                                                                                                                                                                                                       | 2.776                                                                                            |
| $\mu$ (mm <sup>-1</sup> )                                                    | 33.030                                                                                                                                                                                                                                      | 15.555                                                                                           |
| <i>F</i> (000)                                                               | 560                                                                                                                                                                                                                                         | 544                                                                                              |
| GOF on <i>F</i> <sup>2</sup>                                                 | 1.200                                                                                                                                                                                                                                       | 1.077                                                                                            |
| Absolute Flack Factor                                                        | ---                                                                                                                                                                                                                                         | 0.298(10)                                                                                        |
| Absorption correction                                                        | Semi-empirical from equivalents                                                                                                                                                                                                             |                                                                                                  |
| Refinement method                                                            | Full-matrix least-squares on <i>F</i> <sup>2</sup>                                                                                                                                                                                          |                                                                                                  |
| Data/restraints/parameters                                                   | 606/0/34                                                                                                                                                                                                                                    | 1761/1/65                                                                                        |
| <i>R</i> <sub>1</sub> , <i>wR</i> <sub>2</sub> [ <i>I</i> > 2σ ( <i>I</i> )] | 0.0637, 0.1716                                                                                                                                                                                                                              | 0.0325, 0.0805                                                                                   |
| <i>R</i> <sub>1</sub> , <i>wR</i> <sub>2</sub> (all data)                    | 0.0638, 0.1717                                                                                                                                                                                                                              | 0.0338, 0.0812                                                                                   |
| Min/Max Δρ /eÅ <sup>-3</sup>                                                 | -6.847/5.525                                                                                                                                                                                                                                | -1.28/2.09                                                                                       |
| CCDC                                                                         | 1940636                                                                                                                                                                                                                                     | 1940635                                                                                          |
| Growth method                                                                | Slow evaporation method<br>(THF or DMF)                                                                                                                                                                                                     | Solid-state method                                                                               |
|                                                                              | <sup>a</sup> <i>w</i> =1/[ <i>s</i> <sup>2</sup> ( <i>F</i> <sub>o</sub> <sup>2</sup> )+( 0.1334 <i>P</i> ) <sup>2</sup> +0.0000 <i>P</i> ] where <i>P</i> =( <i>F</i> <sub>o</sub> <sup>2</sup> +2 <i>F</i> <sub>c</sub> <sup>2</sup> )/3  |                                                                                                  |
|                                                                              | <sup>b</sup> <i>w</i> =1/[ <i>s</i> <sup>2</sup> ( <i>F</i> <sub>o</sub> <sup>2</sup> )+( 0.0201 <i>P</i> ) <sup>2</sup> + 9.5216 <i>P</i> ] where <i>P</i> =( <i>F</i> <sub>o</sub> <sup>2</sup> +2 <i>F</i> <sub>c</sub> <sup>2</sup> )/3 |                                                                                                  |

**Table S2.** Crystal data and structure refinements for MA<sub>2</sub>Pb(SCN)<sub>2</sub>I<sub>2</sub> at 293(2) K

| Empirical formula                             | (CH <sub>3</sub> NH <sub>3</sub> ) <sub>2</sub> Pb(SCN) <sub>2</sub> I <sub>2</sub> <sup>a</sup>                                      | (CH <sub>3</sub> NH <sub>3</sub> ) <sub>2</sub> Pb(SCN) <sub>2</sub> I <sub>2</sub> <sup>b</sup> | (CH <sub>3</sub> NH <sub>3</sub> ) <sub>2</sub> Pb(SCN) <sub>2</sub> I <sub>2</sub> <sup>c</sup> |
|-----------------------------------------------|---------------------------------------------------------------------------------------------------------------------------------------|--------------------------------------------------------------------------------------------------|--------------------------------------------------------------------------------------------------|
| Actual formula                                | (N) <sub>2</sub> Pb(SCN) <sub>2</sub> I <sub>2</sub>                                                                                  | (N) <sub>2</sub> Pb(SCN) <sub>2</sub> I <sub>2</sub>                                             | (N) <sub>2</sub> Pb(SCN) <sub>2</sub> I <sub>2</sub>                                             |
| Formula weight/ g·mol <sup>-1</sup>           | 605.17                                                                                                                                | 605.17                                                                                           | 605.17                                                                                           |
| Temperature/K                                 |                                                                                                                                       | 293(2) K                                                                                         |                                                                                                  |
| Wavelength/Å                                  |                                                                                                                                       | 0.71073                                                                                          |                                                                                                  |
| Crystal color                                 | Dark red                                                                                                                              | Dark red                                                                                         | Dark red                                                                                         |
| Crystal system                                | Orthorhombic                                                                                                                          | Orthorhombic                                                                                     | Orthorhombic                                                                                     |
| Space group                                   | <i>Pmn</i> 2 <sub>1</sub> (no. 19)                                                                                                    | <i>Pmmn</i> (no. 59)                                                                             | <i>Pmmn</i> (no. 59)                                                                             |
| a/Å                                           | 18.5818(18)                                                                                                                           | 6.4675(3)                                                                                        | 18.5641(5)                                                                                       |
| b/Å                                           | 6.2690(6)                                                                                                                             | 18.5799(8)                                                                                       | 6.4716(2)                                                                                        |
| c/Å                                           | 6.4733(6)                                                                                                                             | 6.2629(2)                                                                                        | 6.26520(10)                                                                                      |
| α/°                                           | 90.00                                                                                                                                 | 90.00                                                                                            | 90.00                                                                                            |
| β/°                                           | 90.00                                                                                                                                 | 90.00                                                                                            | 90.00                                                                                            |
| γ/°                                           | 90.00                                                                                                                                 | 90.00                                                                                            | 90.00                                                                                            |
| Volume/Å <sup>-3</sup>                        | 754.07(12)                                                                                                                            | 752.58(5)                                                                                        | 752.70(3)                                                                                        |
| Crystal size (mm <sup>3</sup> )               | 0.25×0.1×0.068                                                                                                                        | 0.12×0.08×0.05                                                                                   | 0.1×0.08×0.05                                                                                    |
| Z                                             | 2                                                                                                                                     | 2                                                                                                | 2                                                                                                |
| Density/g·cm <sup>-3</sup>                    | 2.665                                                                                                                                 | 2.671                                                                                            | 2.670                                                                                            |
| μ(mm <sup>-1</sup> )                          | 15.523                                                                                                                                | 15.553                                                                                           | 15.551                                                                                           |
| F (000)                                       | 520                                                                                                                                   | 520                                                                                              | 520                                                                                              |
| GOF on F <sup>2</sup>                         | 1.116                                                                                                                                 | 1.326                                                                                            | 1.282                                                                                            |
| Absolute Flack Factor                         | 0.136(11)                                                                                                                             | ---                                                                                              | ---                                                                                              |
| Absorption correction                         |                                                                                                                                       | Semi-empirical from equivalents                                                                  |                                                                                                  |
| Refinement method                             |                                                                                                                                       | Full-matrix least-squares on F <sup>2</sup>                                                      |                                                                                                  |
| Data/restraints/parameters                    | 1355/1/56                                                                                                                             | 974/0/38                                                                                         | 972/0/38                                                                                         |
| R <sub>1</sub> , wR <sub>2</sub> [I > 2σ (I)] | 0.0376, 0.1123                                                                                                                        | 0.0586, 0.1590                                                                                   | 0.0582, 0.1618                                                                                   |
| R <sub>1</sub> , wR <sub>2</sub> (all data)   | 0.0388, 0.1130                                                                                                                        | 0.0598, 0.1598                                                                                   | 0.0621, 0.1651                                                                                   |
| Min/Max Δρ /eÅ <sup>-3</sup>                  | -0.916/2.026                                                                                                                          | -3.743/3.897                                                                                     | -3.628/3.011                                                                                     |
| CCDC                                          | 1939379                                                                                                                               | 1939377                                                                                          | 1939378                                                                                          |
| Growth method                                 | Slow evaporation method (THF)                                                                                                         | Anti-solvent diffusion method (THF/Et <sub>2</sub> O)                                            | Anti-solvent diffusion method (THF/Toluene)                                                      |
|                                               | <sup>a</sup> w=1/[s <sup>2</sup> (Fo <sup>2</sup> )+(0.0674P) <sup>2</sup> +4.4575P] where P=(Fo <sup>2</sup> +2Fc <sup>2</sup> )/3   |                                                                                                  |                                                                                                  |
|                                               | <sup>b</sup> w=1/[s <sup>2</sup> (Fo <sup>2</sup> )+(0.0316P) <sup>2</sup> +30.3281P] where P=(Fo <sup>2</sup> +2Fc <sup>2</sup> )/3  |                                                                                                  |                                                                                                  |
|                                               | <sup>c</sup> w=1/[s <sup>2</sup> (Fo <sup>2</sup> )+(0.0499P) <sup>2</sup> + 25.7378P] where P=(Fo <sup>2</sup> +2Fc <sup>2</sup> )/3 |                                                                                                  |                                                                                                  |

**Table S3.** Crystal data and structure refinements for MA<sub>2</sub>Pb(SCN)<sub>2</sub>I<sub>2</sub> at 190 K and 363 K

| Empirical formula                             | (CH <sub>3</sub> NH <sub>3</sub> ) <sub>2</sub> Pb(SCN) <sub>2</sub> I <sub>2</sub> <sup>a</sup> | (CH <sub>3</sub> NH <sub>3</sub> ) <sub>2</sub> Pb(SCN) <sub>2</sub> I <sub>2</sub> <sup>b</sup> |
|-----------------------------------------------|--------------------------------------------------------------------------------------------------|--------------------------------------------------------------------------------------------------|
| Actual formula                                | (CH <sub>3</sub> NH <sub>3</sub> ) <sub>2</sub> Pb(SCN) <sub>2</sub> I <sub>2</sub>              | (N) <sub>2</sub> Pb(SCN) <sub>2</sub> I <sub>2</sub>                                             |
| Formula weight/ g·mol <sup>-1</sup>           | 641.29                                                                                           | 605.17                                                                                           |
| Temperature/K                                 | 190 K                                                                                            | 363 K                                                                                            |
| Wavelength/Å                                  | 0.71073                                                                                          |                                                                                                  |
| Crystal color                                 | Dark red                                                                                         | Black                                                                                            |
| Crystal system                                | Orthorhombic                                                                                     | Orthorhombic                                                                                     |
| Space group                                   | <i>Pmn</i> 2 <sub>1</sub> (no. 31)                                                               | <i>Pmmn</i> (no. 59)                                                                             |
| a/Å                                           | 18.3886(8)                                                                                       | 6.4409(5)                                                                                        |
| b/Å                                           | 6.2412(3)                                                                                        | 18.8578(13)                                                                                      |
| c/Å                                           | 6.4624(2)                                                                                        | 6.2954(4)                                                                                        |
| α/°                                           | 90.00                                                                                            | 90.00                                                                                            |
| β/°                                           | 90.00                                                                                            | 90.00                                                                                            |
| γ/°                                           | 90.00                                                                                            | 90.00                                                                                            |
| Volume/Å <sup>-3</sup>                        | 741.67(5)                                                                                        | 764.65(9)                                                                                        |
| Crystal size (mm <sup>3</sup> )               | 0.1×0.08×0.05                                                                                    | 0.1×0.08×0.05                                                                                    |
| Z                                             | 2                                                                                                | 2                                                                                                |
| Density/g·cm <sup>-3</sup>                    | 2.872                                                                                            | 2.628                                                                                            |
| μ(mm <sup>-1</sup> )                          | 15.790                                                                                           | 15.308                                                                                           |
| F (000)                                       | 568                                                                                              | 520                                                                                              |
| GOF on F <sup>2</sup>                         | 0.947                                                                                            | 1.196                                                                                            |
| Absolute Flack Factor                         | 0.088(7)                                                                                         | ---                                                                                              |
| Absorption correction                         | Semi-empirical from equivalents                                                                  |                                                                                                  |
| Refinement method                             | Full-matrix least-squares on F <sup>2</sup>                                                      |                                                                                                  |
| Data/restraints/parameters                    | 1316/1/67                                                                                        | 2445/0/110                                                                                       |
| R <sub>1</sub> , wR <sub>2</sub> [I > 2σ (I)] | 0.0228, 0.0421                                                                                   | 0.0551, 0.1620                                                                                   |
| R <sub>2</sub> , wR <sub>2</sub> (all data)   | 0.0277, 0.0442                                                                                   | 0.0563, 0.1631                                                                                   |
| Min/Max Δρ /eÅ <sup>-3</sup>                  | -0.841/ 0.647                                                                                    | -2.758/ 3.890                                                                                    |
| CCDC                                          | 1939376                                                                                          | 1939380                                                                                          |

<sup>a</sup>w=1/[s<sup>2</sup>(Fo<sup>2</sup>)+(0.00P)<sup>2</sup>+ 0.00P], where P=(Fo<sup>2</sup>+2Fc<sup>2</sup>)/3  
<sup>b</sup>w=1/[s<sup>2</sup>(Fo<sup>2</sup>)+(0.0824P)<sup>2</sup>+ 9.4420P]where P=(Fo<sup>2</sup>+2Fc<sup>2</sup>)/3

## REFERENCES

- (1) Dang, Y.; Liu, Y.; Sun, Y.; Yuan, D.; Liu, X.; Lu, W.; Liu, G.; Xia, H. and Tao, X. Bulk crystal growth of hybrid perovskite material  $\text{CH}_3\text{NH}_3\text{PbI}_3$ , *CrystEngComm* **2015**, *17*, 665-670.
- (2) Dang, Y.; Zhou, Y.; Liu, X.; Ju, D.; Xia, S.; Xia, H. and Tao, X. Formation of hybrid perovskite tin iodide single crystals by top-seeded solution growth, *Angew. Chem. Int. Ed.* **2016**, *55*, 3447-3450; *Angew. Chem.* **2016**, *128*, 3508-3511.
- (3) Dang, Y.; Liu, X.; Sun, Y.; Song, J.; Hu, W. and Tao, X., Bulk chiral halide perovskite single crystals for active circular dichroism and circularly polarized luminescence, *J. Phys. Chem. Lett.* **2020**, *11*, 1689-1696.
- (4) Dang, Y.; Zhong, C.; Zhang, G.; Ju, D.; Wang, L.; Xia, S.; Xia, H. and Tao, X. Crystallographic investigations into properties of acentric hybrid perovskite single crystals  $\text{NH}(\text{CH}_3)_3\text{SnX}_3$  ( $\text{X} = \text{Cl}, \text{Br}$ ), *Chem. Mater.* **2016**, *28*, 6968-6974.
- (5) Dang, Y.; Wei, J.; Liu, X.; Wang, X.; Xu, K.; Lei, M.; Hu W. and Tao, X. Layered hybrid perovskite solar cells based on single-crystalline precursor solutions with superior reproducibility, *Sustainable Energy Fuels*, **2018**, *2*, 2237-2243.
- (6) Dolomanov, O.V.; Bourhis, L. J.; Gildea, R. J.; Howard J. A. K. & Puschmann, H. OLEX2: a complete structure solution, refinement and analysis program, *J. Appl. Cryst.* **2009**, *42*, 339-341.
- (7) Spek, A. L. Structure validation in chemical crystallography, *Acta Cryst.* **2009**, *D65*, 148-155.
- (8) Sheldrick, G. M. Crystal structure refinement with SHELXL, *Acta Cryst.* **2015**, *C71*, 3-8.
- (9) Wendlandt, W. M.; Hecht, H. G. *Reflectance Spectroscopy*; Interscience: New York, **1966**; p62.
